# Supplementary material for: High-strain shape memory polymer networks crosslinked by SiO2
Source: Royal Society of Chemistry journal article supplement (doi:10.1039/c1jm11022e), 2011-01-01
Supplement: c1jm11022e.pdf [file c1jm11022e.pdf]

## Supporting Information:

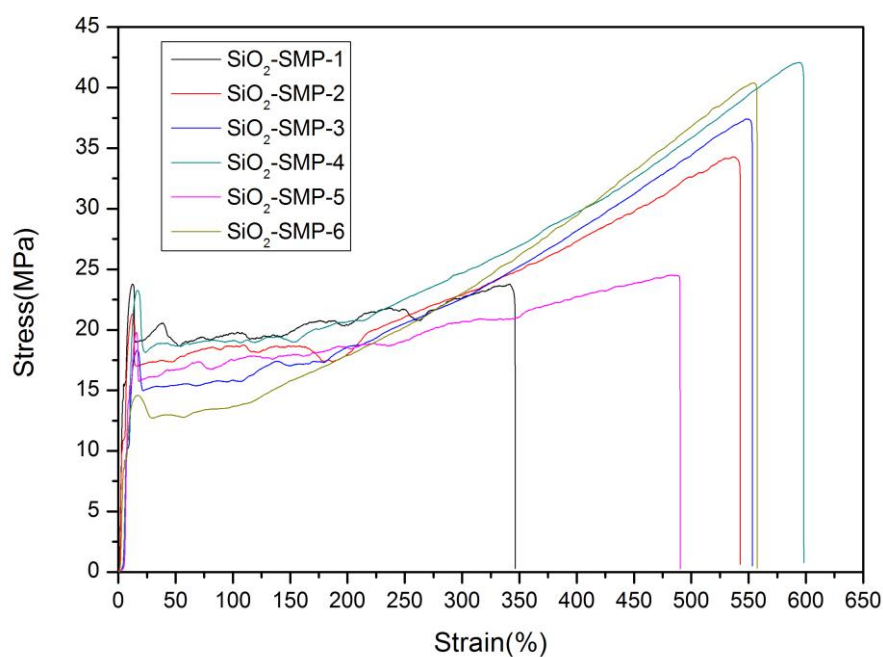

Fig.S1 Stress-strain curves of polymer network  $\text{SiO}_2$ -SMP with various compositions.

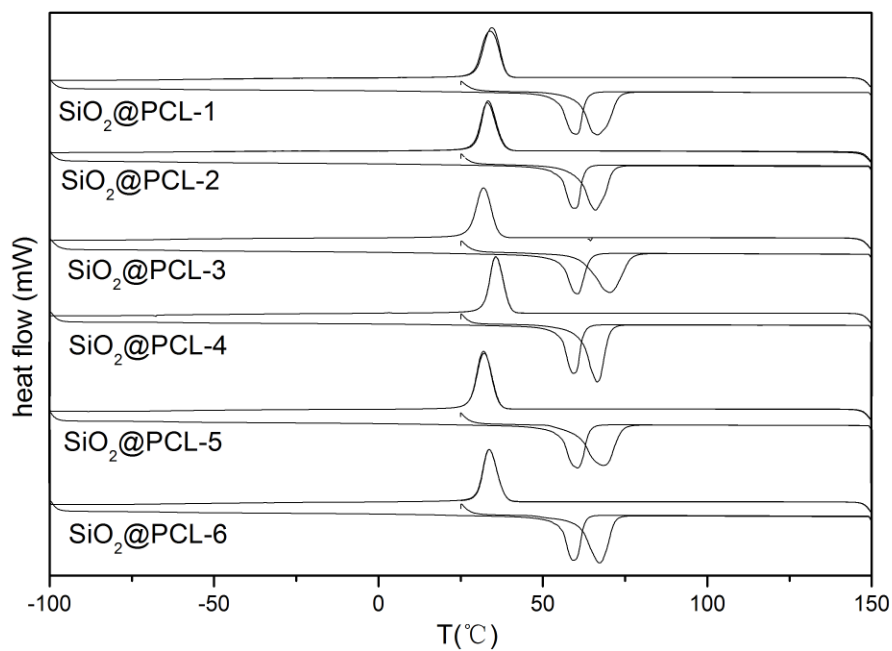

Fig.S2 DSC curves both first and second heating and cooling of  $\text{SiO}_2$ @PCL.

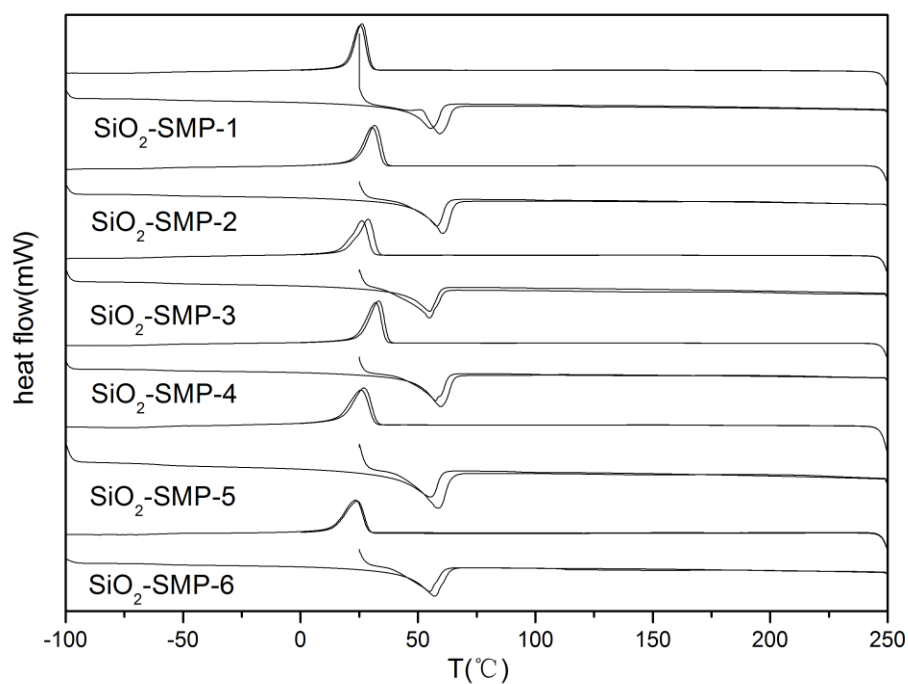

Fig.S3 DSC curves both first and second heating and cooling of SiO<sub>2</sub>-SMP.

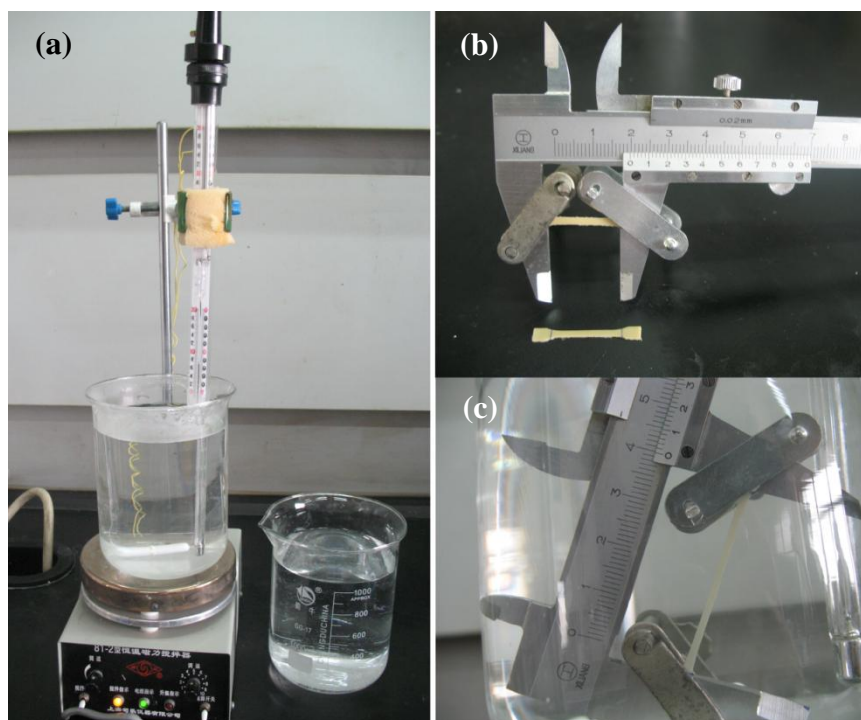

Fig. S4 The photographs of homemade equipment for cycle thermal tensile test;  
(a) two temperature water bath; (b) the clamp for elongate and measure the elongation;  
(c) the sample in strain in the water bath.

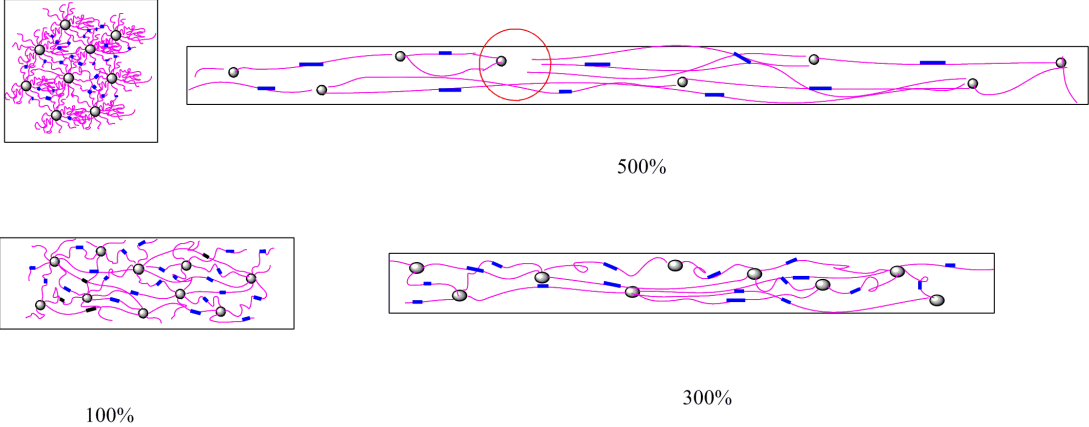

Fig. S5 Schematic representation of the tensile mechanism.
